# Supplementary material for: LipoParticles: Lipid-Coated PLA Nanoparticles Enhanced In Vitro mRNA Transfection Compared to Liposomes
Source: PubMed Central journal article supplement (PMC7999670; doi:10.3390/pharmaceutics13030377), 2021-03-12
Supplement: pharmaceutics-13-00377-s001.pdf [file pharmaceutics-13-00377-s001.pdf]

# Supplementary Materials: LipoParticles: Lipid-Coated PLA Nanoparticles Enhanced In Vitro mRNA Transfection Compared to Liposomes

Camille Ayad, Pierre Libeau, Céline Lacroix-Gimon, Catherine Ladavière and Bernard Verrier

## Study of the transfection efficiency of pcDNA with liposomes as carrier

**Table S1.** Characterization of luc pcDNA formulations prepared through pLbL strategy using liposomes as carrier (ratio pcDNA/LAH4-L1 = 1/20 *w/w*). Results are represented as mean ± SD of different batches (*n* = 3).

| Formulation                   | Mean hydrodynamic diameter (nm) | Polydispersity index (PDI) | Zêta potential (mV) |
|-------------------------------|---------------------------------|----------------------------|---------------------|
| Liposomes                     | 81 ± 3                          | 0.215 ± 0.009              | 45 ± 4              |
| Liposomes-pcDNA               | 108 ± 4                         | 0.370 ± 0.048              | 43 ± 5              |
| Liposomes-pcDNA-LAH4-L1 (LbL) | 95 ± 3                          | 0.228 ± 0.019              | 47 ± 1              |

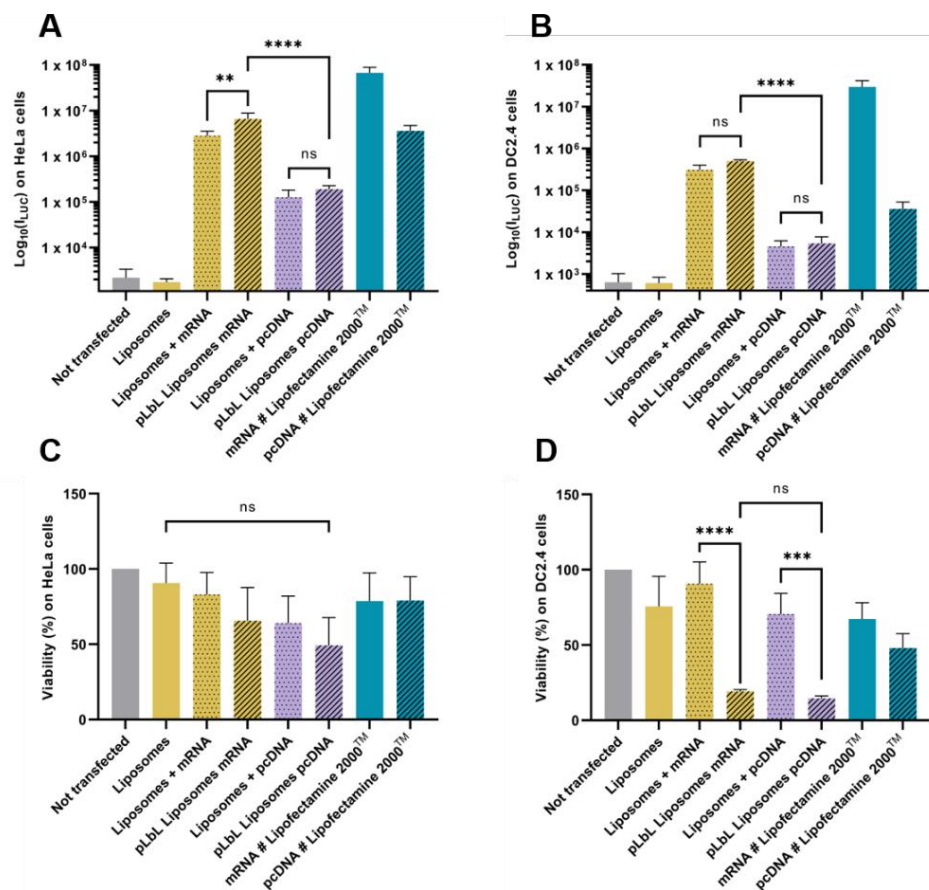

**Figure S1.** In vitro evaluation at +24 h (top) of the transfection efficiency through the measurement of the luminescence intensity (Bright-Glo luciferase Assay) and (bottom) cell viability (Presto-Blue assay) obtained after transfection of 90 ng eq. of either Fluc mRNA or luciferase-pcDNA3.1 formulated in liposomes using pLbL strategy (ratio nucleic acids/LAH4-L1 = 1:20 *w/w*) on HeLa (A,C) and DC 2.4 (B,D) cells. Lipofectamine 2000<sup>TM</sup> was used as positive control. Data are presented as mean ± SD and statistically analyzed using one-way ANOVA followed by Tukey's multiple comparison test (not significant (ns): *p* > 0.01, \*\*: *p* < 0.001, \*\*\*: *p* < 0.0001 and \*\*\*\*: *p* < 0.00001).
